# Supplementary material
Source: PubMed Central journal article supplement (PMC7615296)
Supplement: EMS163133-supplement-Supplementary_Information_File.pdf [file EMS163133-supplement-Supplementary_Information_File.pdf]

1 **Figure legends:**

2 **Extended Data Figure 1: Summary of the cross-organ off-target transcriptomic atlas**  
3 **(COOTA).**

4 **(a)** Top 100 overexpressed genes in AML HSPC (left) and healthy T cells (right) from  
5 differential expression analysis. Normalized expression values were logarithmized and scaled  
6 to unit variance. **(b)** Overview of 11 scRNA-seq datasets of various healthy tissues used to  
7 quantify off-target antigen expression. **(c)** UMAP plots of 11 scRNA-seq datasets with colors  
8 highlighting clustering into respective cell types. Cell annotations were provided by the authors  
9 of the respective studies. **(d)** Current CAR targets in AML were cross-referenced to filters used  
10 for the single cell-based target screening approach. OE HSC-/Prog-like: overexpressed on  
11 HSC-/Prog-like cells with log fold change > 2 and FDR-adjusted  $p \leq 0.01$ , using a t-test with  
12 overestimated variance. Red cross: Antigen did not fulfill the respective threshold or criteria.  
13 Green check: Thresholds or criteria were passed.

15 **Extended Data Figure 2: CSF1R and CD86 are consistently expressed across multiple**  
16 **patients with differing molecular subtypes.**

17 **(a, c)** Amount of malignant and normal cells per AML patient of van Galen *et al.* **(a)** or Petti *et*  
18 *al.* **(c).** **(b, d)** Percentage of malignant and normal cells expressing target genes *CSF1R*, *CD86*  
19 and reference genes *CD123*, *CD33* for each sequenced AML patient of van Galen *et al.* **(b)**  
20 or Petti *et al.* **(d).** **(e)** Data from van Galen *et al.*<sup>21</sup> was used as a reference (top left) to map  
21 cells from Petti *et al.*<sup>28</sup> (top right) using scANVI<sup>29</sup>. UMAP representation showing the mapped  
22 query and reference data together (bottom). **(f)** Computational CAR target antigen  
23 identification using the mapped dataset of Petti *et al.* by stepwise evaluation against a set of  
24 criteria for an ideal and effective CAR target antigen. The decreasing number of screened  
25 AML target genes are shown on the bottom. CSPA: Cell surface protein atlas; HPA: Human  
26 protein atlas. **(g)** Volcano plot showing *CD86* and *CSF1R* target genes with their respective  
27 FDR-adjusted  $\log_{10}$  p-value and  $\log_2$  fold changes from differential expression analysis  
28 between malignant HSPC-like and healthy HSPC using a t-test with overestimated variance.

30 **Extended Data Figure 3: mCSF1R CART do not persist in immunocompetent mice.**

31 **(a)** Construct design of mCSF1R or mEpCAM CART or mCherry T cells. **(b)** Representative  
32 histograms of mCSF1R or mEpCAM expression on J774A.1 cells. Staining was carried out  
33 twice. **(c)** Summary of treatment schedule for *in vivo* toxicity assessment of mCSF1R CART.

34 **(d)** Mean weight curves of mice treated with  $3 \times 10^6$  mCSF1R CART or mCherry T cells.  $n =$   
35 10 mice per group. Error bars indicate s.e.m. **(e)** Quantification of tissue-resident CD11b+ cells  
36 (left) or mCherry+ T cells of parent population (right, parent population: CD3 and CD8 positive  
37 cells) in different organs by flow cytometry. Data are mean  $\pm$  s.e.m. of  $n = 10$  mice. **(d, e)**  
38 Statistical significance was calculated using two-way ANOVA with Šidák multiple comparison  
39 correction. **(f)** Scheme of treatment schedule for *in vivo* toxicity assessment of mCSF1R  
40 CART. WBI, whole body irradiation. Mice were treated with  $3 \times 10^6$  mCSF1R CART or mCherry  
41 T cells per mouse.  $6 \times 10^6$  mEpCAM CART were transferred as a positive control. **(g)** Serum  
42 levels of indicated markers one (d1) or seven (d7) days after ACT. Depicted is the fold change  
43 of serum levels of the indicated groups from the PBS-treated control group. CRP, C-reactive  
44 protein; AST, aspartate aminotransferase; ALT, alanine aminotransferase; GLDH, glutamate  
45 dehydrogenase;  $\gamma$ -GT, gamma-glutamyl-transferase; LDH, lactate dehydrogenase.  $n = 3$  mice  
46 per group. Statistically significant increases in the serum of mEpCAM CART treated mice  
47 compared to mCSF1R CART or control-treated mice at day 7 were observed for GLDH ( $p <$   
48 0.0001). **(h)** Histopathological analysis of indicated organs after treatment with mEpCAM or  
49 mCSF1R CART or mCherry T cells. Representative images of  $n = 3$  mice per group. Signs of  
50 organ damage are indicated in the picture: black arrowhead: thickening of alveolar epithel. **(i)**  
51 Representative maximum intensity projection of microglia (green) and macrophages (green)  
52 in CX<sub>3</sub>CR1-GFP mice on days 0 (baseline), 4, 7, 10, 14, 21 and 28 after intravenous injection  
53 of  $10^7$  mCSF1R CART (red). Depth from brain surface: 0-100  $\mu$ m. Scale bars as depicted: 50  
54  $\mu$ m and 20  $\mu$ m. mCSF1R CART: i.c. injection,  $n = 5$  mice; i.v. injection,  $n = 3$  mice; mCherry T  
55 cells: i.c./ i.v. injection = 2 mice.

56 **Extended Data Figure 4: Assessment of different hCSF1R CAR constructs *in vitro*.**

57 **(a)** Construct design of all anti-human constructs used throughout the course of the study. **(b)**  
58 Representative flow cytometric images of construct expression on primary human T cells. **(c)**  
59 Activation of different hCSF1R CART after incubation with plate-bound hCSF1R protein  
60 quantified by flow cytometry. **(d)** T cells expressing different hCSF1R CAR constructs were  
61 co-cultured with luc+ target antigen expressing AML tumor cell lines or antigen negative  
62 NALM-6 control cells for 48 hours at the indicated E:T ratios. Cell lysis was quantified by BLI.  
63 **(e)** Proliferation dye-labeled hCSF1R CART were co-cultured with respective cell lines for 4  
64 or 7 days at a E:T ratio of 0.5:1. Proliferation was subsequently assessed by trace dilution.  
65 One representative image of three different donors is shown. **(f)** Bead quantified T cell  
66 numbers. **(g)** Secretion of IFN $\gamma$  by T cells transduced with different hCSF1R CAR constructs  
67 after co-culture with AML cell lines. **(h)** Secretion of IFN $\gamma$  **(left)** or IL-2 **(right)** of hCSF1R,

68 CD86 or control CART in co-culture with AML cell lines. **(c, d, f - h)** Data are mean  $\pm$  s.e.m. of  
69 three independent donors.

70 LTR, long terminal repeat; scFv, single chain fragment variable; TM, transmembrane, IC,  
71 intracellular, ED, extracellular domain, CTRL-transduced, control-transduced.

72

73 **Extended Data Figure 5: CSF1R is highly expressed on primary AML blasts.**

74 **(a)** Representative histograms of CSF1R expression on AML cell lines after freeze and thaw  
75 cycles. **(b, c)** Schematic of culture methods used to cultivate primary AML samples throughout  
76 the course of the study. **(d)** Expression of CSF1R on primary AML samples after 24 to 48  
77 hours of culture in cytokine rich medium. Left: Percentage positive cells gated to isotype. Each  
78 dot represents different primary AML samples. Right: Representative flow cytometric images  
79 from three different AML samples. Data are mean  $\pm$  s.e.m. from six different donors. **(e)** Gating  
80 strategy to identify CD34<sup>+</sup> CD38 $\pm$  malignant HSPC. **(f, g)** Expression of target antigens  
81 **(CSF1R, f; CD86, g)** on malignant HPC (top) and HSC (bottom). **(h)** Expression of CSF1R on  
82 PDX-388 sample at indicated time points after thawing. **(i)** IHC staining of human CSF1R in  
83 the bone marrow of control-treated PDX-388-bearing mice. Shown are two representative  
84 pictures (right, left) in two different magnifications (top 10x, bottom 20x). **(j)** Left: CD33 CART  
85 used for i.v. injection into PDX-388-bearing mice **(Fig. 5 k - m)** were co-cultured *ex vivo* with  
86 luc<sup>+</sup> Mv4-11 tumor cells for 48 hours at indicated E:T ratios. Specific lysis was quantified by  
87 BLI. Shown is mean  $\pm$  s.e.m. of three biological replicates. Experiment was carried out twice.  
88 **(k)** Representative flow cytometric image of percentage of CD3 positive T cells (left) and  
89 percentage of CAR (c-myc) positive T cells (right) in the blood of PDX-388-bearing mice. **(l,**  
90 **m)** *Ex vivo* CD33 expression on PDX-388 AML blasts in the bone marrow after treatment with  
91 CD33 CART or CTRL-transduced T cells (CD19 CART) measured by flow cytometry. Depicted  
92 are representative histograms **(l)** or the change of CD33-PE-Cy5 MFI in CD33 CART treated  
93 mice compared to CTRL-transduced treated mice **(m)**. **(m)** Data are mean  $\pm$  s.e.m. from n =  
94 3 mice injected with CD33 CART compared to CTRL-transduced mouse. **(k - m)** n = 3 mice  
95 injected with CD33 CART), n = 1 mouse injected with CTRL-transduced T cells.

96

97 **Extended Data Figure 6: hCSF1R CAR T cells are effective *in vivo*.**

98 **(a)** Treatment scheme used for PDX-372 model. **(b - d)** BLI images **(b)**, BLI quantification of  
99 tumor-burden **(c)** and survival curves **(d)** of PDX-372 tumor-bearing mice injected with  $2 \times 10^6$   
100 hCSF1R, CD33 CART or control-transduced T cells (n = 5 mice per group). **(b)** White cross,  
101 censored mice; red cross, mice succumbed to disease. **(e)** IHC staining of human CSF1R in

102 the bone marrow of control-treated PDX-372-bearing mice. Left: IHC for human CSF1R. Right:  
103 Isotype (top) and detection system control (bottom) for CSF1R IHC staining. **(f)** Schematic of  
104 treatment scheme used for OCI-AML3 cell line xenograft model. **(g, h)** BLI images **(g)** and  
105 survival curves **(h)** of OCI-AML3 tumor-bearing mice injected with  $6 \times 10^6$  hCSF1R CART or  
106 control-transduced T cells ( $n = 3 - 4$  mice per group). **(g)** Red cross, mice succumbed to  
107 disease. **(a - h)** Statistical significance was calculated using two-way ANOVA with Šidák  
108 multiple comparison correction. **(i)** log<sub>2</sub> expression of CSF1R and CD86 target antigens or  
109 CD123 and CD33 controls in bulk RNA-sequencing dataset of the Leukemia MILE study ( $n =$   
110 615 different patients). HBM, healthy bone marrow. Data was obtained from bloodspot.eu.  
111 Dashed line represents the median, dotted line the interquartile ranges. Statistical significance  
112 was calculated using ordinary one-way ANOVA with Šidák multiple comparison correction.  
113 **(j)** Simple linear regression analysis of *in vitro* lysis of CAR T cells and target antigen density  
114 of the indicated AML cell line measured by flow cytometry.  $r =$  spearman correlation coefficient,  
115  $p =$  p-value. Three independent antigen density measurements were used to perform  
116 regression analysis. For Kaplan-Meier-Curves, statistical significance was calculated with log-  
117 rank test.

118

119 **Supplementary Table 1: Summary of patient characteristics of all primary human**  
120 **patient samples used during the study.**

121 **(a)** Patient characteristics of all primary AML samples. **(b)** Characteristics of PDX samples  
122 used for *in vivo* experiments.

123

124

125 **References**

126

- 127 21 van Galen, P. *et al.* Single-Cell RNA-Seq Reveals AML Hierarchies Relevant to  
128 Disease Progression and Immunity. *Cell* **176**, 1265-1281 e1224,  
129 doi:10.1016/j.cell.2019.01.031 (2019).
- 130 28 Petti, A. A. *et al.* A general approach for detecting expressed mutations in AML cells  
131 using single cell RNA-sequencing. *Nat Commun* **10**, 3660, doi:10.1038/s41467-019-  
132 11591-1 (2019).
- 133 29 Xu, C. *et al.* Probabilistic harmonization and annotation of single-cell transcriptomics  
134 data with deep generative models. *Mol Syst Biol* **17**, e9620,  
135 doi:10.15252/msb.20209620 (2021).
- 136
